# Supplementary material for: Statistics of protein-DNA binding and the total number of binding sites for a transcription factor in the mammalian genome
Source: PubMed Central journal article supplement (PMC2822526; doi:10.1186/1471-2164-11-s1-s12), 2010-02-10

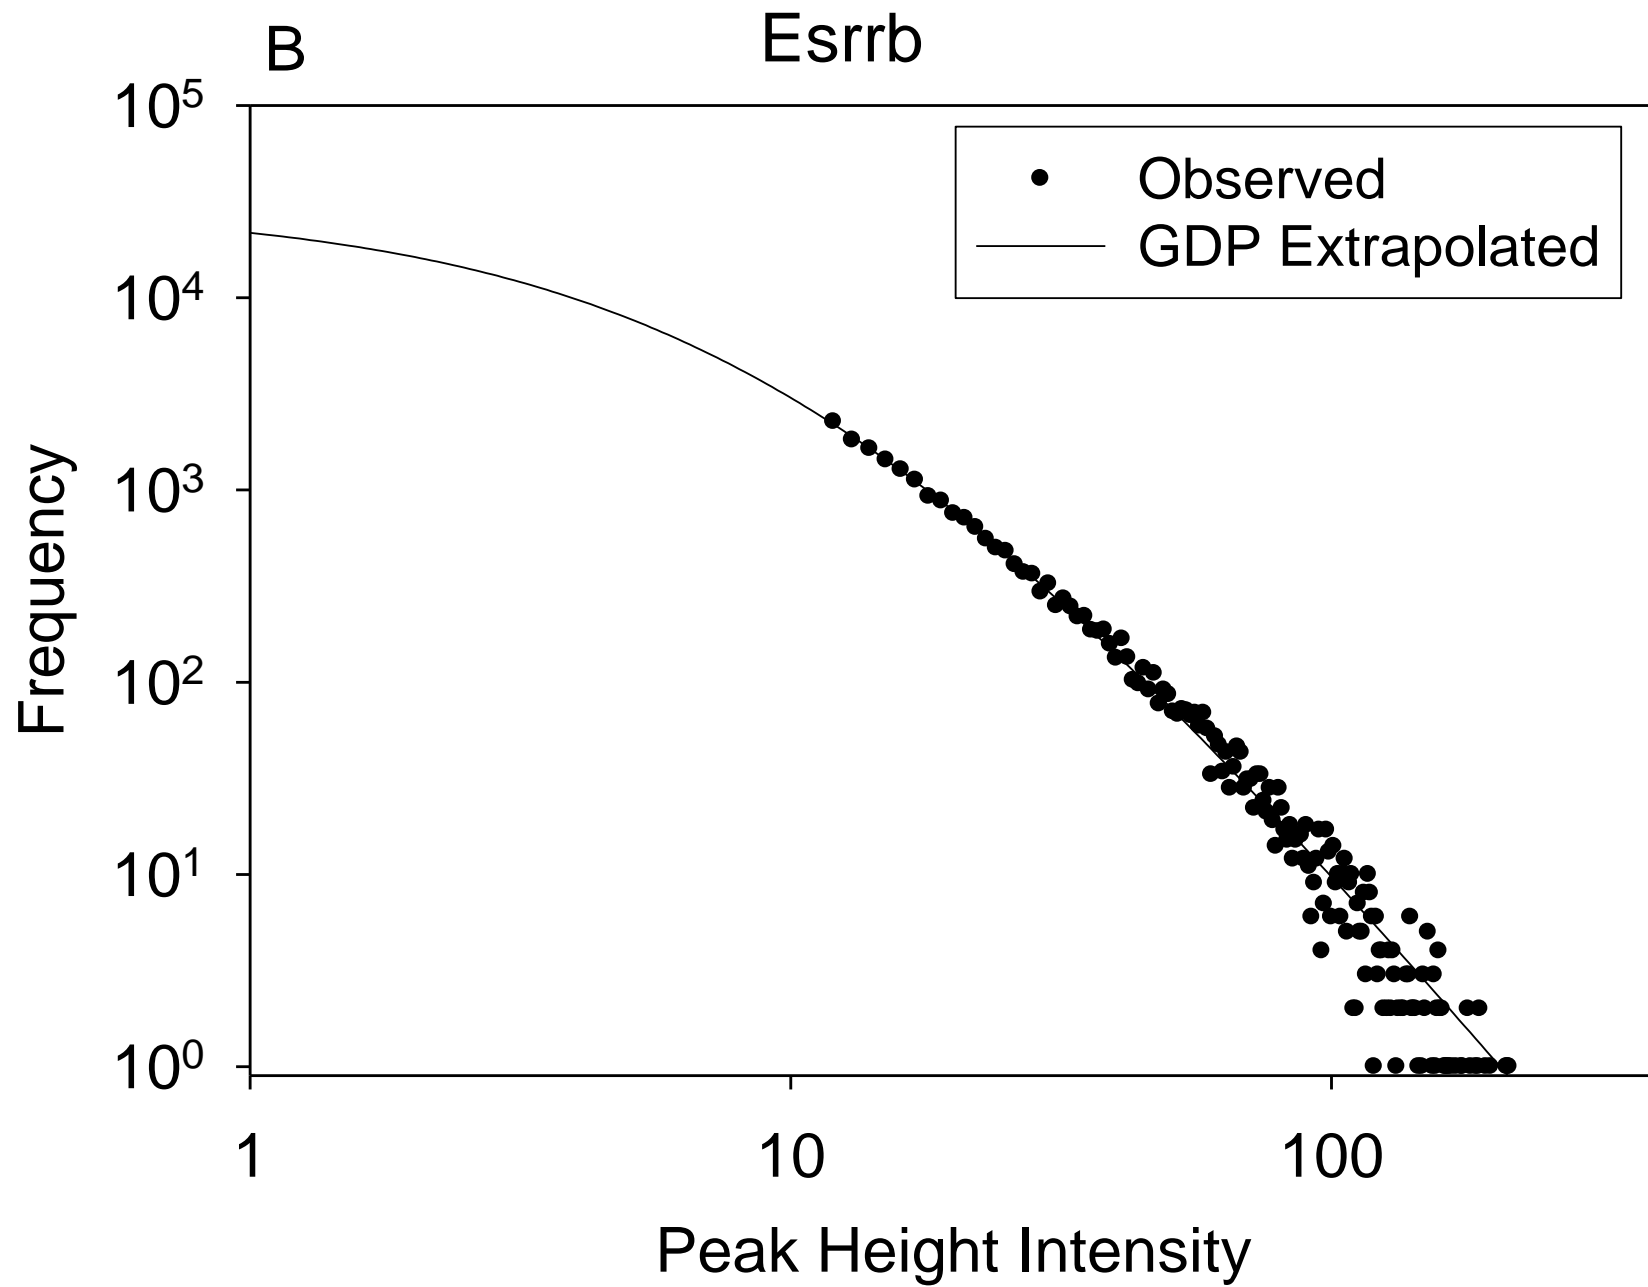

Supplement: 1471-2164-11-S1-S12-S1.pdf [file 1471-2164-11-S1-S12-S1.pdf]
