# Supplementary material for: Statistics of protein-DNA binding and the total number of binding sites for a transcription factor in the mammalian genome
Source: PubMed Central journal article supplement (PMC2822526; doi:10.1186/1471-2164-11-s1-s12), 2010-02-10

## Additional file 6

**Title:** Venn diagrams of number of E-boxes co-localization in ChIP-seq defined binding loci

**Description:** A: Venn diagram of number of E-boxes positive loci found in vicinity  $\pm 150$  nt of the centre of ChIP-seq defined binding loci. B: Venn diagram of number of E-boxes positive loci found in vicinity  $\pm 250$  nt of the centre of ChIP-seq defined binding loci.

A)

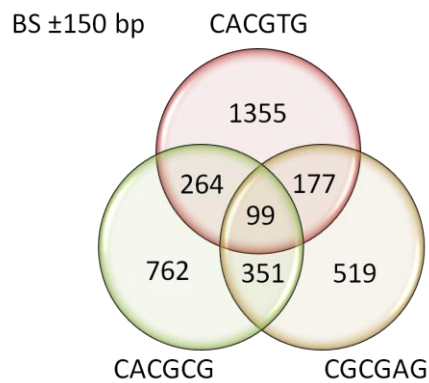

B)

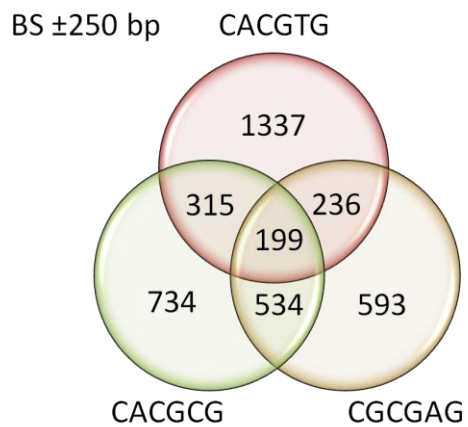

Supplement: 1471-2164-11-S1-S12-S6.pdf [file 1471-2164-11-S1-S12-S6.pdf]
